# 1 Asciminib mitigates DNA damage stress signalling 2 induced by cyclophosphamide in the ovary

3 Luca Mattiello<sup>1</sup>, Giulia Pucci<sup>1</sup>, Francesco Marchetti<sup>1</sup>, Marc Diederich<sup>2</sup> and Stefania Gonfloni<sup>1,\*</sup>

4 <sup>1</sup> Department of Biology, University of Rome Tor Vergata, via della Ricerca Scientifica, 00133 Rome, Italy;  
5 [luca.mattiello@alice.it](mailto:luca.mattiello@alice.it) (L.M.); [giulia.pucci94@gmail.com](mailto:giulia.pucci94@gmail.com) (G.P.); [francescomarchetti@icloud.com](mailto:francescomarchetti@icloud.com) (F.M.)

6 <sup>2</sup> College of Pharmacy, Seoul National University, 1 Gwanak-ro, Gwanak-gu, Seoul 08826, Republic of Korea,  
7 [marcdiederich@snu.ac.kr](mailto:marcdiederich@snu.ac.kr)

8  
9 \* Correspondence: [stefania.gonfloni@uniroma2.it](mailto:stefania.gonfloni@uniroma2.it)

10 **Abstract:** Cancer treatments often have adverse effects on the quality of life for young women. One  
11 of the most relevant negative impacts is the loss of fertility. Cyclophosphamide is one of the most  
12 detrimental chemotherapeutic drugs for the ovary. Cyclophosphamide may induce the destruction  
13 of dormant follicles while promoting follicle activation and growth. Herein, we demonstrate the *in*  
14 *vivo* protective effect of the allosteric Bcr-Abl tyrosine kinase inhibitor Asciminib on signalling  
15 pathways activated by cyclophosphamide in mouse ovaries. Besides, we provide evidence that  
16 Asciminib did not interfere with the cytotoxic effect of cyclophosphamide in MCF7 breast cancer  
17 cells. Our data indicate that concomitant administration of Asciminib mitigates the  
18 cyclophosphamide-induced ovarian reserve loss without preventing the anticancer potential of  
19 cyclophosphamide. Altogether these observations are relevant for the development of effective  
20 fertoprotective adjuvants to preserve the ovarian reserve from the damaging effect of cancer  
21 therapies.

22 **Keywords:** ovarian reserve, cyclophosphamide, DNA damage response, drug repurposing,  
23 allosteric tyrosine kinase inhibitors, Asciminib

---

## 25 1. Introduction

26 Chemotherapy, radiation, or combinations of them are commonly used in cancer therapy.  
27 Ovarian failure and infertility are well-known side effects of such therapies [1-3].  
28 Cyclophosphamide (Cy) is an alkylating chemotherapeutic drug routinely used against solid and  
29 hematological malignancies [4]. Recent studies highlighted the primary target of Cy *in vivo* in  
30 murine ovaries [5-8]. Cyclophosphamide exposure induced death of growing granulosa cells and  
31 the concomitant activation of the DNA Damage Response (DDR) and AKT-FOXO3a signaling  
32 axis in the nucleus of reserve oocytes [6]. These observations supported the hypothesis that  
33 damaging stress pathways are activated in a concomitant manner both in somatic and germ cells  
34 following chemotherapy. However, the identification of sentinel molecules directly involved in  
35 communicating stress signalling remains a daunting task, as the physiological changes in the  
36 ovary reflect both direct or indirect effects of genotoxic assaults. Despite this, understanding the  
37 molecular mechanisms underlying ovarian reserve loss induced by cancer therapies remains  
38 essential for developing a more effective treatment to preserve the fertility of female patients.

## 39 2. Results

### 40 2.1 Asciminib induced a re-localization of the c-Abl tyrosine kinase to the perinuclear zone.

41 In this study, we evaluated the effects of Cy (or of an active metabolite 4-hydroperoxy-  
42 cyclophosphamide, 4-OH-Cy) alone and in combination with Asciminib, either *in vivo* in mice or  
43 *in vitro* in a model cell line for breast cancer (MCF7). First, we validated the re-localization of c-  
44 Abl after treatment with Asciminib as previously described for the allosteric inhibitor GNF2 [9].  
45 We monitored the c-Abl localization in a transgenic MEF line (Mouse Embryonic Fibroblast,  
46 lacking the expression of c-Abl) following transfection with a c-Abl expression vector. We  
47 evaluated the c-Abl localization by immunofluorescence (IF) assay in transfected MEF cells,  
48 treated with different c-Abl inhibitors. We tested either allosteric ligands such as GNF2,  
49 Asciminib, and one ATP-binding competitive inhibitor, Imatinib. IF assays clearly showed that  
50 Asciminib, as well as GNF2, induced a re-localization of c-Abl in the perinuclear zone as  
51 indicated by the yellow arrows (Figure 1). On the contrary, treatment with Imatinib did not cause  
52 any enrichment of c-Abl kinase in the perinuclear zone.

A

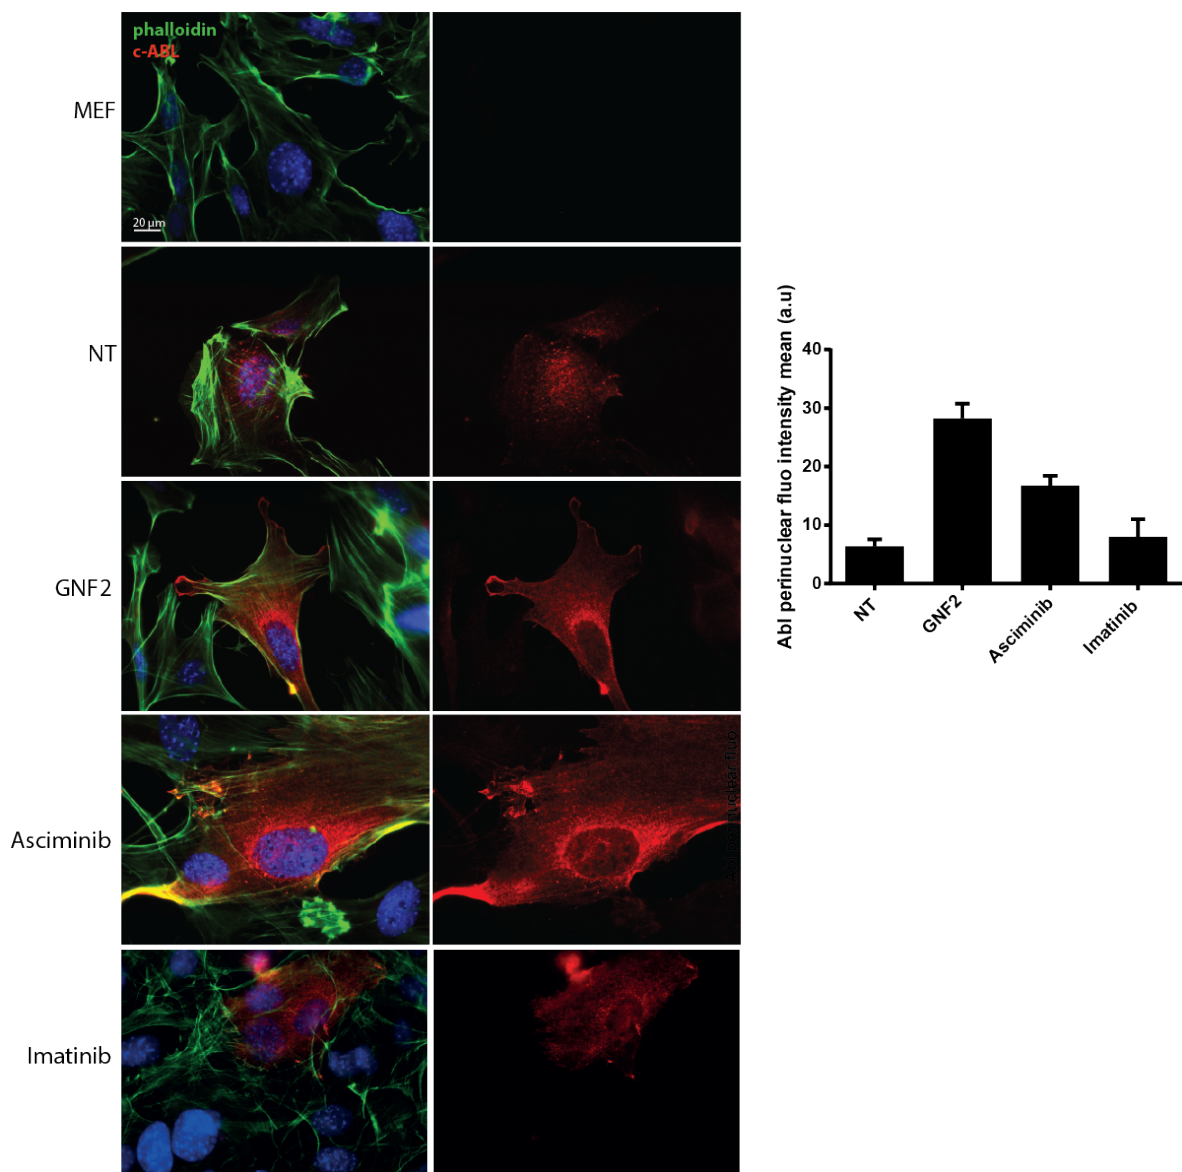

53

54 **Figure 1. Allosteric inhibitors caused an enrichment of c-Abl tyrosine kinase in the perinuclear**  
55 **zone.** IF assay on MEF Abl<sup>-/-</sup> cells that were transiently transfected with an expression vector for

56 c-Abl. The yellow arrows indicated the re-localization of c-Abl tyrosine kinase in the perinuclear  
57 zone induced by Asciminib or GNF2 exposure. Bar column represents mean  $\pm$  s.e.m. Scale bar 20  
58  $\mu$ m.

### 59 **Asciminib modulated the DDR and the follicle activation induced by Cy exposure *in vivo*.**

60 Next, we injected P7 mice with Cy alone (100mg/kg) or in combination with increasing  
61 concentrations of Asciminib (0.1, 0.2, and 0.5 mg/kg, respectively). At different time points, the  
62 ovaries were dissected, lysed, and analyzed by IF or western blot (W.B.) assays. Co-treatment  
63 with Asciminib resulted in partial inhibition of TAp63 phosphorylation (commonly observed as  
64 a shift of TAp63 protein by W.B. assay). In Figure 2A, we observed a partial prevention of TAp63  
65 shift (see black arrows) 18 hours after co-injection of Cy and Asciminib. We observed the  
66 phosphorylation of histone H2AX at Ser139 ( $\gamma$ H2AX), an early marker of DDR in the ovarian  
67 lysates. Of note, co-treatment with Asciminib affected the  $\gamma$ H2AX phosphorylation as assessed  
68 by W.B. assay (Supplementary Figure 1).

69 To assess whether Asciminib may affect DDR activation in primordial/primary oocytes, we  
70 monitored the phosphorylation of DDR sentinel proteins by IF assays performed on ovarian  
71 sections. We found that Asciminib attenuated DNA stress signalling induced by Cy in the ovarian  
72 reserve. Co-treated ovaries showed reduced staining for phospho-DNA-PK,  $\gamma$ H2AX and cleaved  
73 PARP in the nucleus of reserve oocytes (Figure 2 panels B, C, D). Furthermore, co-treatment of  
74 reserve oocytes with Asciminib and Cy prevented nuclear AKT phosphorylation (Figure 2 E).  
75 Taken together, these data demonstrated that Asciminib modulated signalling pathways  
76 activated by Cy in the ovary.

77

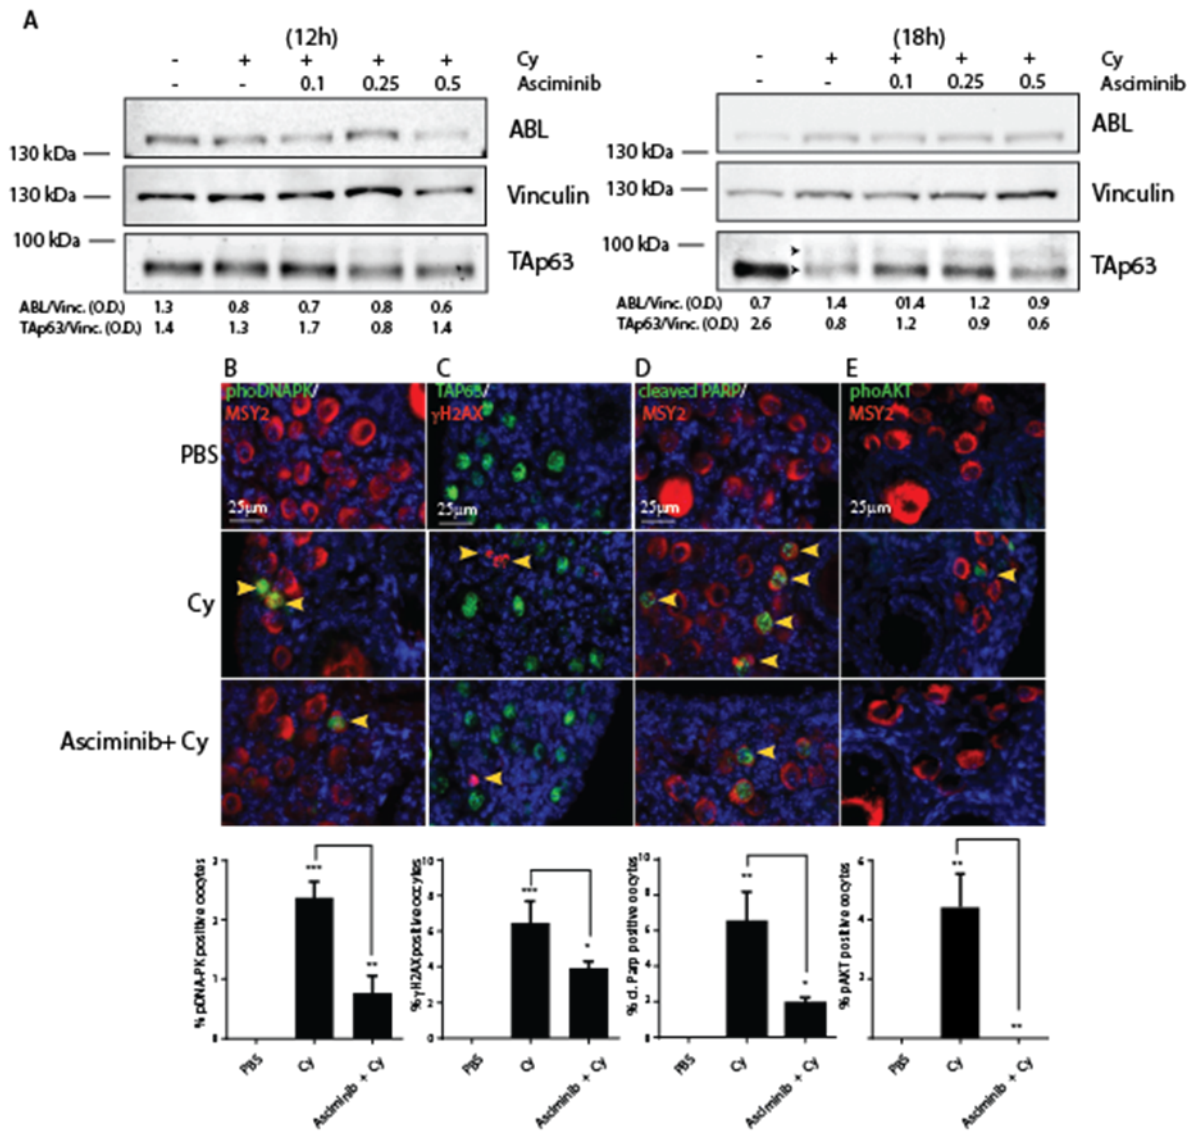

78

79

80

81

82

83

84

85

86

87

88

89

90

91

92

**Figure 2. Asciminib mitigated both DDR and apoptosis induced by Cy in the ovarian reserve.** (A) W.B. analysis of ovarian lysates from female pups injected with Cy 100mg/kg alone or in combination with various doses of Asciminib and collected at different time points. P7 mice were injected with vehicle (PBS) or Cy (100 mg/kg) alone or in tandem with Asciminib (0.25mg/kg) and sacrificed within 16 h from injection. Numerical values, under the blots, represent band densitometries normalized on the housekeeping gene. (B) DNA-PK activation was evaluated by IF assay using phospho-specific antibodies (green), while Msy2 (red) was used as a cytoplasmic marker for germ cells. (C) γH2AX phosphorylation was evaluated by IF assay using phospho-specific antibodies (red), while p63 (green) was used as a nuclear marker for germ cells (D) Follicle reserve apoptosis was assessed by IF assay with two specific antibodies against cleaved PARP (green) and Msy2 (red). (E) The follicular activation was assessed by IF assay with specific phospho-antibodies for AKT (T308) (green) and Msy2 (red). Quantification was performed by counting several (6 < x < 8) middle ovarian sections derived from three distinct ovaries. Scale Bar magnification, 25 μm. Bar column represents mean ± s.d.; statistical significance was determined



93 using one-way analysis of variance (ANOVA) (\*P < 0.05; \*\*P < 0.01; \*\*\*P < 0.001 compared with  
94 PBS-treated group).

### 95 **Asciminib protected the ovarian reserve following Cy treatment.**

96 Next, we injected female P6 pups with Cy (100mg/kg) alone or in combination with Asciminib  
97 (0.25mg/kg). Three days after injection, we collected ovaries to perform immunohistochemistry  
98 (IHC) assays with an antibody against cytoplasmic germ cell antigen (Msy2) (red) (Figure 3). We  
99 counted the follicle reserve from mid-ovary sections of different ovaries. IHC assays of ovarian  
100 sections showed a massive depletion of primordial and primary follicles in Cy-treated mice,  
101 whereas a Cy+Asciminib co-treatment significantly rescued reserve follicles. Follicle protection  
102 was dependent on the concentration of Asciminib, as shown in Supplementary Figure 2A, higher  
103 dosage of Asciminib (1 mg/kg) did not prevent follicle death induced by Cy and seemed to have  
104 a toxic effect *per se*.

105

106

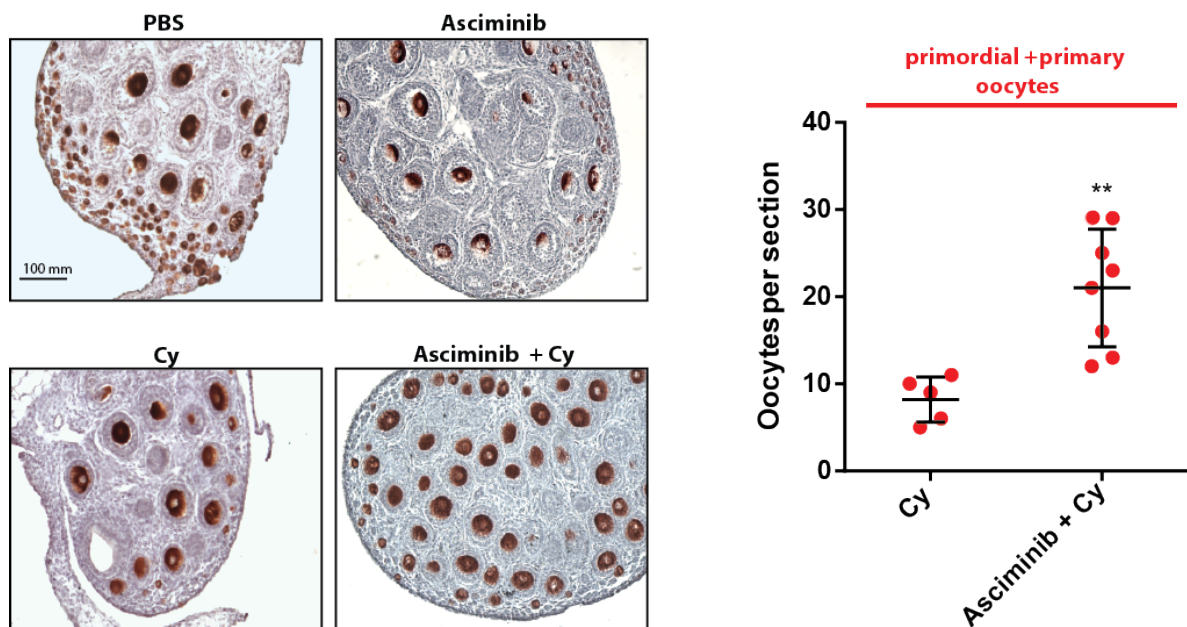

107

108 **Figure 3. Asciminib protected the ovarian reserve from Cy treatment.** Ovaries of each  
109 experimental group were dissected three days after injection (Mice were injected with Cy  
110 100mg/kg alone or in tandem with Asciminib 0.25mg/kg) and analyzed by IHC assay with Msy2  
111 antibody. Several ovaries from independent experiments were analyzed. Each dot in the box plot  
112 represents the average primordial+primary follicles numbers per section of each gonad collected.  
113 Statistical significance was determined using one-way analysis of variance (ANOVA) (\*\*P<0.01  
114 compared to Cy 100 mg/kg). Scale Bar, 100  $\mu$ m.

### 115 **Asciminib did not prevent the DNA damage induced by Cy in MCF7**

116 A clinically-used fertro-protective drug should not interfere with the therapeutic effect of DNA-  
117 damaging chemotherapies. We validated this assumption by assessing the effect of Asciminib on  
118 4-hydroperoxy-cyclophosphamide (4-OH-Cy)-treated MCF7 breast tumor cells. Our results  
119 showed that the co-treatment with Asciminib did not affect 4-OH-Cy-induced phosphorylation  
120 of DDR marker proteins like ATM,  $\gamma$ H2AX or p53 (Figure 4A). Besides, single-cell gel

121 electrophoresis (Comet) assays showed that Asciminib did not interfere with the DNA-damaging  
 122 effect of 4-OH-Cy (Figure 4B). Lastly, the co-administration of Asciminib did not affect the  
 123 cytotoxic effect of 4-OH-Cy (Figure 4C). Altogether these data support the potential use of  
 124 Asciminib as a *ferro-protective* drug without abrogating the cytotoxic effect of 4-OH-CY.

125

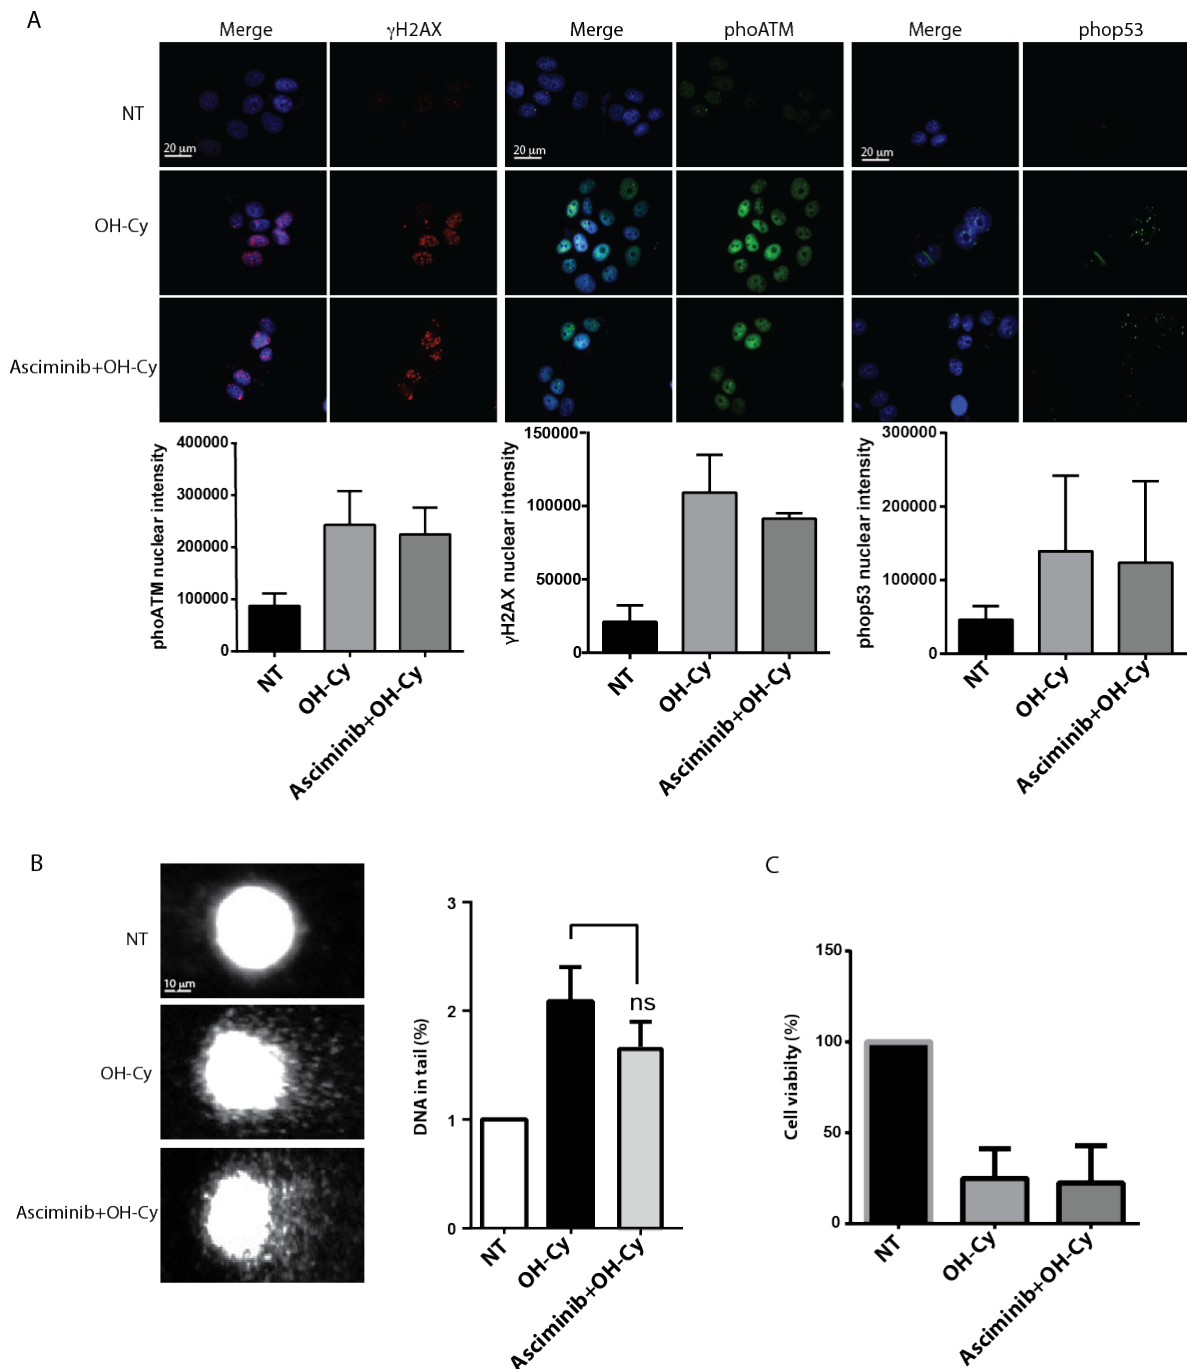

126

127

128 **Figure 4. Asciminib did not prevent the cytotoxicity of 4-OH-Cy in MCF7.** MCF7 cells were

129 treated with Asciminib (0.5  $\mu$ M). After 1 hour, 4-OH-Cy was added in the medium (4-OH-Cy 10

130  $\mu$ M for comet and IF assay, 4-OH-Cy 50  $\mu$ M for MTS assay. (A) DDR signalling was evaluated

131 by IF after 4 hours of 4-OH-Cy treatment using specific phospho-antibodies for sentinel proteins.

Bar columns represent mean  $\pm$  s.e.m.; nuclear fluorescence intensity was evaluated by ImageJ

132 software. Scale bar 20  $\mu\text{m}$ . (B) DNA fragmentation was assessed by comet assay following 4 hours  
133 of 4-OH-Cy treatment; DNA percentage in tail quantification was evaluated by Comet Score  
134 software. Bar columns represent mean  $\pm$  s.e.m.; Scale bar 10  $\mu\text{m}$ . (C) Drug toxicity was measured  
135 by MTS assay after 48 hours of 4-OH-Cy treatment. Bar columns represent mean  $\pm$  s.e.m.

### 136 3. Discussion

137 In young women, chemotherapy regimens increase the risk of premature ovarian failure (POF)  
138 and infertility. Genotoxic agents have two different effects on ovarian function: the first one is  
139 immediate, induces amenorrhea and the loss of growing follicles; the second one has a long-term  
140 impact by inducing a loss of the ovarian reserve. While the first effect is reversible, the loss of the  
141 follicle reserve is permanent and leads to infertility. As such, fertility preservation is an urgent  
142 issue for cancer survivors. Pharmacological agents can prevent follicle loss at the time of  
143 treatment while providing several advantages over fertility conservation techniques. These small  
144 molecules could act as fertoprotective drugs [10] by counteracting the effects of chemotherapy  
145 on the ovarian reserve. Fertoprotective drugs may be suitable for patients of all ages while  
146 avoiding the use of invasive hormonal and surgical procedures. Such fertoadjuvants should not  
147 interfere with chemotherapeutic treatments while preventing endocrine side effects of premature  
148 ovarian failure and infertility [11]. Primordial follicles maintain their genome integrity for several  
149 decades in human without relying on classical DNA quality check controls of somatic cells during  
150 the cell cycle [12]. A better understanding of the signalling pathways activated in the follicle  
151 reserve (formed by a single oocyte surrounded by few granulosa cells) following chemotherapy  
152 is fundamental for the development of effective fertoprotective drugs. Recent findings from  
153 Rinaldi *et al* suggested that the oocytes reaching a threshold level of unrepaired DSBs after  
154 irradiation can be eliminated by a signalling pathway that required both p53 and TAp63 $\alpha$   
155 transcription factors [13]. Compelling evidence suggested a role of c-Abl in the oocyte  
156 degeneration induced by chemotherapy [14-16]. In mice, pharmacological inhibition of c-Abl  
157 counteracted the cytotoxic effect of cisplatin [14, 16, 17] and cyclophosphamide [6]. In this study,  
158 we tested a novel selective allosteric compound targeting c-Abl, Asciminib, against the damaging  
159 effects of cyclophosphamide. Allosteric inhibitors bind a deep pocket in the large lobe of the c-  
160 Abl catalytic domain, which is very far from the ATP binding site. Of note, small allosteric ligands  
161 induced conformational changes even in the ATP binding pocket of the kinase, preventing its  
162 active conformation [18]. Asciminib is a novel and more selective inhibitor compared to GNF2  
163 [19]. Also, Asciminib is already used in phase III assays (NCT03106779) against resistant forms  
164 of Chronic Myeloid Leukemia (CML) [20]. Here, we showed that the co-administration of  
165 Asciminib had a protective effect on the ovarian reserve, as assessed by immunohistochemistry  
166 (IHC) performed three days after Cy injection. Besides, we found that Asciminib did not  
167 counteract the genotoxic effect exerted by an active Cy active metabolite (4-OH-Cy) on breast  
168 cancer cells. Together these data support the potential use of Asciminib as a fertoadjuvant during  
169 chemotherapeutic regimens.

### 170 4. Materials and Methods

#### 171 Animals and injection

172 All procedures involving mice and care have been conducted at the Interdepartmental Service  
173 Centre-Station for Animal Technology (STA), University of Rome "Tor Vergata", in accordance  
174 with the ethical standards, according to the Declaration of Helsinki, in compliance with our  
175 institutional animal care guidelines and following national and international directives (Italian  
176 Legislative Decree 26/2014, Directive 2010/62/E.U. of the European Parliament and of the  
177 Council). The ovaries were collected from CD-1 mice (Charles River) of 6 to 8 days old. Newborn

178 mice (P6) were treated with intraperitoneal (I.P.) injection with PBS or Cy (100 mg per kg of body  
179 weight). Mice were pre-treated with Asciminib (0,1-0,5 mg per kg of body weight). Cy (BAXTER)  
180 was fresh prepared at 40 mg/ml in PBS. We dissolved Asciminib in DMSO.

#### 181 Immunohistochemistry, Follicle counting and statistical analysis

182 We prepared sections from ovaries fixed in MetaCarnoy solution, embedded in paraffin and cut  
183 in slices of 7  $\mu$ m of thickness. Sections were dewaxed, re-hydrated, and microwaved. Slices were  
184 then permeabilised with PBS triton 0,2 % and incubated with MSY-2 antibody (Santa Cruz). The  
185 staining was performed with immunocruz staining system for anti-goat antibody (Santa Cruz,  
186 sc-2023) and 3-aminoethyl-9-ethylcarbazole as substrate (AEC, Sigma). Sections were  
187 counterstained with hematoxylin and cover-slipped with Aquatex. Quantification of primordial  
188 and primary or secondary follicles was derived from histological analysis, counting Msy2-  
189 positive germ cells of mid-ovary sections. For each ovary (derived from P9 mice P9 pups), several  
190 central slices ( $10 < n < 15$ ) are included in the counting, except for smaller peripheral slices (12-14  
191 on average per each ovary). Quantification of primordial/primary follicle reserve is expressed as  
192 mean of immature follicles (primordial plus primary follicles) per single ovary. Average values  
193 for each ovary are represented as discrete points on a scatter plot. Mean value  $\pm$  S.D. are shown  
194 in the scatter plot. The analysis of variance is evaluated with one-way ANOVA, with Turkey  
195 multiple comparison Test using PRISM 6 (Graph Pad software) (\* $P < 0.05$ ; \*\* $P < 0.01$ ; \*\*\* $P < 0.001$ ) or  
196 by unpaired Student's t test where indicated.

197

#### 198 Immunofluorescence

199 We prepared sections from ovaries sections fixed in MetaCarnoy solution, embedded in paraffin  
200 and cut in slice of 7  $\mu$ m of thickness. Sections were dewaxed re-hydrated and microwaved in  
201 sodium citrate 10mM pH6, to expose the antigens. Unspecific-binding sites were blocked by  
202 incubating sections for 2 hours in a blocking solution (PBS plus 1% glycine 5% FBS and 5% NGS  
203 (normal goat serum). Ovaries sections were then incubated overnight with antibodies against  
204 MSY-2, p63,  $\gamma$ H2AX, p-DNA-PK, pAKT and cleaved PARP. After washing in PBS triton 0,05%,  
205 tissue sections were incubated with Alexa 555-goat anti-mouse (life technologies) and Alexa 488-  
206 goat anti rabbit (Invitrogen). Nuclei were stained with 1  $\mu$ g/mL Hoechst 33342 dyes for cells  
207 (Thermo Fischer Scientific) in PBS 1X.

208

#### 209 Immunoblot analysis

210 P7 dry ice-frozen ovaries were homogenized with a mini-pestle in ice-cold lysis buffer (50 mM  
211 Tris-HCl pH 7.5, 150 mM NaCl, 0.5% NP-40, 5 mM EDTA, 0.5% sodium deoxycholate, 1 mM  
212 phenylmethylsulfonyl fluoride, 1 mM sodium o-vanadate, 10  $\mu$ g ml<sup>-1</sup> Tosyl phenylalanyl  
213 chloromethyl ketone (TPCK), 10  $\mu$ g ml<sup>-1</sup>, Tosyl-L-lysyl-chloromethane hydrochloride (TLCK)  
214 supplemented with protease inhibitors, (all purchased from SIGMA). Equal amounts of protein  
215 extract (equivalent of one up to three ovaries) was loaded onto 6%, 8% or 12% SDS-PAGE gel and  
216 transferred to a nitrocellulose membrane (Amersham Bioscience). Immunoblot densitometry  
217 were performed using ImageJ software.

218



219 Cell culture

220 MEF Abl<sup>-/-</sup> cells were kindly gifted by the Koleske lab (Yale, USA). MCF7 cells were kindly  
221 provided by the Barilà group (IRCCS-Fondazione Santa Lucia, Rome, Italy). Cells were grown in  
222 DMEM medium (GIBCO) supplemented with 15% FBS (Mef Abl<sup>-/-</sup>) or 10% FBS (for MCF7)  
223 (Lonza) and 100 U/ml penicillin/streptomycin (Lonza) in a humidified atmosphere containing 5%  
224 CO<sub>2</sub> at 37°C.

225

226 Cells transfection and Immunofluorescence assay

227 MEF Abl<sup>-/-</sup> were grown in a 6-wells plate on cover slips and transfected with a plasmid encoding  
228 wild-type c-Abl 1b isoform for 16 hours (at low passages), by using lipofectamine 2000 DNA  
229 Transfection Reagent (Invitrogen) according to the manufacturer's instruction. During this time  
230 the cells were also treated with small-molecule c-Abl compounds alone (DPH, GNF-2, Asciminib)  
231 for 4 hours and then analyzed by Immunofluorescence.

232 MCF-7 cultured in a 6-wells plate on cover slips were incubated for 60 minutes with allosteric c-  
233 Abl inhibitors, Asciminib (0.5 μM) or GNF-2 (10 μM), treated with 4-  
234 hydroperoxycyclophosphamide (4-OH-Cy) (sc-206885) for 4 hours and analyzed by  
235 Immunofluorescence.

236 Cells were grown on cover slips, then washed in PBS and fixed with 4% paraformaldehyde for  
237 10 min at room temperature. Cells were incubated with a solution containing Triton X-100 (0.5%),  
238 blocked for 2 hours with a blocking solution (PBS, Triton X-100 0.1%, BSA 5%), and then  
239 incubated with primary antibodies against p-ATM, γH2AX and p-p53 for 60 minutes. After  
240 washing in PBS/Triton 0,1%, cells were incubated with Alexa 555-goat anti-mouse (Life  
241 technologies) and Alexa 488-goat anti rabbit (Invitrogen) for 30 minutes. Nuclei were stained  
242 with 1 μg/ml 4,6-diamidino-2-phenylindole dihydrochloride (Thermo Fischer Scientific).  
243 Fluorescence images were obtained by Leica DMR Fluorescence Microscope (Leica  
244 Microsystems, Germany). Perinuclear fluorescence analysis was performed using FIJI software.  
245 In particular, the regions of interest (ROI) were identified using DAPI signal to spot the edge of  
246 nuclear region. From this edge, a 30 pixels-wide area was pointed out using the fix ellipse  
247 command and then used as ROI to measure fluorescence intensity mean.

248

249 Single cell gel electrophoresis assay (Comet Assay)

250 Breast cancer cells (MCF7) cultured in 60 mm dishes were incubated for 60 minutes with allosteric  
251 inhibitors, Asciminib (0.5μM) or GNF-2 (10μM), treated with 4-hydroperoxycyclophosphamide  
252 (OH-Cy) for 4 hours. All following steps were conducted under dim light to prevent the  
253 occurrence of additional DNA damage. The cells were washed with PBS twice and 20μl of each  
254 cellular lysate were mixed with 730μl of 0,5% low melting agarose solution. One tenth of this  
255 volume was dropped on slides coated with 1% normal melting agarose. The slides were covered  
256 with coverslips and placed on ice for 5 min. After gel solidification coverslips were gently  
257 removed. The slides were placed into Schifferdecker type glass cuvette, filled with lysis solution  
258 (10 mmol/L Tris-HCl, 2.5 mol/L NaCl, 100 mmol/L EDTA, 1% Triton-X 100, 10% DMSO, pH 10,  
259 4°C) and incubated at 4°C overnight. After lysis step, the slides were washed with deionized  
260 water and placed into electrophoresis chamber (Apelex) filled with 2.2 L of alkaline

261 electrophoretic solution (300 mmol/L NaOH, 1 mmol/L EDTA, 4°C, pH>13,) for 30 min.  
262 Electrophoresis was performed in the same solution for 20 min at electric field strength of 0,7  
263 V/cm. The applied voltage was 11 V and the current was 280 mA. After electrophoresis, the slides  
264 were washed twice with neutralization buffer (Tris-HCl 0,4M pH 7.5), fixed in 70% ethanol for  
265 10 minutes, dried at room temperature and stored until staining. Immediately prior to  
266 microscopic analysis, the slides were stained with GelRed (SIGMA) in the dark. The images of  
267 comets were analyzed using Comet Score software and approximately 300 cells per slide were  
268 counted. DNA fragmentation was evaluated by the percentage of DNA in the tail of comet (%  
269 DNA tail).

## 270 MTS Assay

271 MCF7 cells were seeded into 96-wells plates at a density of 10000 cells per well (200 µl) and  
272 treated with the following: vehicle control (DMSO), OH-Cy alone or in combination with  
273 Asciminib (0.5 µM). The cells were treated for 24 h. For the MTS assay, the CellTiter 96® AQueous  
274 One Solution Cell Proliferation Assay kit (Promega, USA) was used following the manufacturer's  
275 instruction. The absorbance of cells for each condition was detected at 490 nm with a microplate  
276 reader (Sunrise Tecan microplate reader).

## 277 Reagents

278 Antibodies for Msy-2 (sc-21316) and p-AKT (T308) (sc-16646-R) were purchased from Santa Cruz;  
279 antibody for p-H2AX (γH2AX) (05-636), H2AX (07-627) and were purchased from Millipore;  
280 antibody for p-DNA-PK (S2056) (SAB4504169) was purchased from SIGMA, antibody for p-ATM  
281 (S1981) (200-301-500) was purchased from Rockland, polyclonal antibody for p63 was a home-  
282 made rabbit serum; antibody for p-P53 (S15) (9284) and cleaved PARP (9544) were purchased  
283 from Cell Signalling Technology. Western Blot secondary antibodies were purchased from  
284 Jackson Immunoresearch. All the antibodies were diluted in a blocking solution containing 5%  
285 BSA in PBS tween 0,05% for Western Blotting analysis and in a blocking solution containing 1%  
286 glycine, 5% FBS and 5% NGS for immunofluorescence assay.

287 **Author Contributions:** L.M. performed the majority of the experiments with the help of F.M. G.P.  
288 performed MTS and IF assays in MCF7 for phoATM, phop53, γH2AX. M.D. provided reagents and critical  
289 reading of the paper. S.G. designed, directed the study and wrote the paper.

290 **Funding:** This work was supported by grants from AIRC (IG11344) to S.G.

291 **Acknowledgments:** We thank Luisa Castagnoli for her valuable support. We are indebted to Stefano  
292 Cannata e Sergio Bernardini for technical advice. M.D. is supported by the National Research Foundation  
293 (NRF) (grant number 019R1A2C1009231), by a grant from the MEST of Korea for Tumour  
294 Microenvironment Global Core Research Center (GCRC) (grant number NRF-2011-0030001), by the  
295 Creative-Pioneering Researchers Program through Seoul National University (Funding number: 370C-  
296 20160062), by the Brain Korea 21 (BK21) PLUS programme, by the 'Recherche Cancer et Sang' foundation,  
297 by the 'Recherches Scientifiques Luxembourg' association, by the 'Een Häerz fir kribbskrank Kanner'  
298 association, by the Action LIONS 'Vaincre le Cancer' association and by Télévie Luxembourg.

299

300 **Conflicts of Interest:** The authors declare no conflict of interest

301

## 302 References

- 303 1. Oktem, O.; Oktay, K., Quantitative assessment of the impact of chemotherapy on ovarian follicle  
304 reserve and stromal function. *Cancer* **2007**, 110, (10), 2222-9.
- 305 2. Meirow, D.; Biederman, H.; Anderson, R. A.; Wallace, W. H., Toxicity of chemotherapy and radiation  
306 on female reproduction. *Clin Obstet Gynecol* **2010**, 53, (4), 727-39.
- 307 3. Johnson, E. K.; Finlayson, C.; Rowell, E. E.; Gosiengfiao, Y.; Pavone, M. E.; Lockart, B.; Orwig, K. E.;  
308 Brannigan, R. E.; Woodruff, T. K., Fertility Preservation for Pediatric Patients: Current State and Future  
309 Possibilities. *J Urol* **2017**, 198, (1), 186-194.
- 310 4. Sonmezer, M.; Oktay, K., Fertility preservation in female patients. *Hum Reprod Update* **2004**, 10, (3), 251-  
311 66.
- 312 5. Kalich-Philosoph, L.; Roness, H.; Carmely, A.; Fishel-Bartal, M.; Ligumsky, H.; Paglin, S.; Wolf, I.;  
313 Kanety, H.; Sredni, B.; Meirow, D., Cyclophosphamide Triggers Follicle Activation and "Burnout";  
314 AS101 Prevents Follicle Loss and Preserves Fertility. *Sci Transl Med* **2013**, 5, (185), 185ra62.
- 315 6. Bellusci, G.; Mattiello, L.; Iannizzotto, V.; Ciccone, S.; Maiani, E.; Villani, V.; Diederich, M.; Gonfloni, S.,  
316 Kinase-independent inhibition of cyclophosphamide-induced pathways protects the ovarian reserve  
317 and prolongs fertility. *Cell Death Dis* **2019**, 10, (10), 726.
- 318 7. Luan, Y.; Edmonds, M. E.; Woodruff, T. K.; Kim, S. Y., Inhibitors of apoptosis protect the ovarian reserve  
319 from cyclophosphamide. *J Endocrinol* **2019**, 240, (2), 243-256.
- 320 8. Petrillo, S. K.; Desmeules, P.; Truong, T. Q.; Devine, P. J., Detection of DNA damage in oocytes of small  
321 ovarian follicles following phosphoramidate mustard exposures of cultured rodent ovaries in vitro.  
322 *Toxicol Appl Pharmacol* **2011**, 253, (2), 94-102.
- 323 9. Choi, Y.; Seeliger, M. A.; Panjarian, S. B.; Kim, H.; Deng, X.; Sim, T.; Couch, B.; Koleske, A. J.; Smithgall,  
324 T. E.; Gray, N. S., N-myristoylated c-Abl tyrosine kinase localizes to the endoplasmic reticulum upon  
325 binding to an allosteric inhibitor. *The Journal of biological chemistry* **2009**, 284, (42), 29005-14.
- 326 10. Woodruff, T. K., Preserving fertility during cancer treatment. *Nat Med* **2009**, 15, (10), 1124-5.
- 327 11. Roness, H.; Kashi, O.; Meirow, D., Prevention of chemotherapy-induced ovarian damage. *Fertil Steril*  
328 **2016**, 105, (1), 20-9.
- 329 12. Gonfloni, S., Modulating c-Abl nuclear activity as a strategy to preserve female fertility. *Cell cycle* **2010**,  
330 9, (2), 217-8.
- 331 13. Rinaldi, V. D.; Bloom, J. C.; Schimenti, J. C., Oocyte Elimination Through DNA Damage Signalling from  
332 CHK1/CHK2 to p53 and p63. *Genetics* **2020**, 215, (2), 373-378.
- 333 14. Maiani, E.; Di Bartolomeo, C.; Klinger, F. G.; Cannata, S. M.; Bernardini, S.; Chateauvieux, S.; Mack, F.;  
334 Mattei, M.; De Felici, M.; Diederich, M.; Cesareni, G.; Gonfloni, S., Reply to: Cisplatin-induced

- 335 primordial follicle oocyte killing and loss of fertility are not prevented by imatinib. *Nat Med* **2012**, 18,  
336 (8), 1172-4.
- 337 15. Vandormael-Pournin, S.; Guigon, C. J.; Ishaq, M.; Coudouel, N.; Ave, P.; Huerre, M.; Magre, S.; Cohen-  
338 Tannoudji, J.; Cohen-Tannoudji, M., Oocyte-specific inactivation of Omcg1 leads to DNA damage and  
339 c-Abl/TAp63-dependent oocyte death associated with dramatic remodeling of ovarian somatic cells.  
340 *Cell death and differentiation* **2015**, 22, (1), 108-17.
- 341 16. Gonfloni, S.; Di Tella, L.; Caldarola, S.; Cannata, S. M.; Klinger, F. G.; Di Bartolomeo, C.; Mattei, M.;  
342 Candi, E.; De Felici, M.; Melino, G.; Cesareni, G., Inhibition of the c-Abl-TAp63 pathway protects mouse  
343 oocytes from chemotherapy-induced death. *Nature medicine* **2009**, 15, (10), 1179-85.
- 344 17. Kim, S. Y.; Cordeiro, M. H.; Serna, V. A.; Ebbert, K.; Butler, L. M.; Sinha, S.; Mills, A. A.; Woodruff, T.  
345 K.; Kurita, T., Rescue of platinum-damaged oocytes from programmed cell death through inactivation  
346 of the p53 family signalling network. *Cell death and differentiation* **2013**.
- 347 18. Reddy, E. P.; Aggarwal, A. K., The ins and outs of bcr-abl inhibition. *Genes & cancer* **2012**, 3, (5-6), 447-  
348 54.
- 349 19. Wylie, A. A.; Schoepfer, J.; Jahnke, W.; Cowan-Jacob, S. W.; Loo, A.; Furet, P.; Marzinzik, A. L.; Pelle,  
350 X.; Donovan, J.; Zhu, W.; Buonamici, S.; Hassan, A. Q.; Lombardo, F.; Iyer, V.; Palmer, M.; Berellini, G.;  
351 Dodd, S.; Thohan, S.; Bitter, H.; Branford, S.; Ross, D. M.; Hughes, T. P.; Petruzzelli, L.; Vanasse, K. G.;  
352 Warmuth, M.; Hofmann, F.; Keen, N. J.; Sellers, W. R., The allosteric inhibitor ABL001 enables dual  
353 targeting of BCR-ABL1. *Nature* **2017**, 543, (7647), 733-737.
- 354 20. Hughes, T. P.; Mauro, M. J.; Cortes, J. E.; Minami, H.; Rea, D.; DeAngelo, D. J.; Breccia, M.; Goh, Y. T.;  
355 Talpaz, M.; Hochhaus, A.; le Coutre, P.; Ottmann, O.; Heinrich, M. C.; Steegmann, J. L.; Deininger, M.  
356 W. N.; Janssen, J.; Mahon, F. X.; Minami, Y.; Yeung, D.; Ross, D. M.; Tallman, M. S.; Park, J. H.; Druker,  
357 B. J.; Hynds, D.; Duan, Y.; Meille, C.; Hourcade-Potelleret, F.; Vanasse, K. G.; Lang, F.; Kim, D. W.,  
358 Asciminib in Chronic Myeloid Leukemia after ABL Kinase Inhibitor Failure. *N Engl J Med* **2019**, 381,  
359 (24), 2315-2326.
- 360
